# Supplementary material for: Entinostat-Bortezomib Hybrids against Multiple Myeloma
Source: MDPI journal article supplement (doi:10.3390/molecules28031456), 2023-02-02
Supplement: s1 [file s1]

## SUPPORTING INFORMATION

### Entinostat-bortezomib hybrids against multiple myeloma

Angelica Ferro <sup>1,2,†</sup>, Dafni Graikioti <sup>3,†</sup>, Emre Gezer <sup>1,2</sup>, Constantinos M. Athanassopoulos <sup>3,\*</sup>,  
Muriel Cuendet <sup>1,2,\*</sup>

<sup>1</sup> School of Pharmaceutical Sciences, University of Geneva, 1211 Geneva, Switzerland

<sup>2</sup> Institute of Pharmaceutical Sciences of Western Switzerland, University of Geneva, 1211 Geneva, Switzerland <sup>3</sup>  
Synthetic Organic Chemistry Laboratory, Department of Chemistry, University of Patras, 26504 Patras, Greece

\* Correspondence: muriel.muendet@unige.ch (M.C.); kath@upatras.gr (C.M.A.)

† These authors contributed equally to this work.

### Copies of NMR spectra

## Table of contents

|                                                                |    |
|----------------------------------------------------------------|----|
| Figure S1. $^1\text{H}$ -NMR spectrum of compound 1. ....      | 3  |
| Figure S2. $^{13}\text{C}$ -NMR spectrum of compound 1. ....   | 3  |
| Figure S3. $^1\text{H}$ -NMR spectrum of compound 3. ....      | 4  |
| Figure S4. $^{13}\text{C}$ -NMR spectrum of compound 3. ....   | 4  |
| Figure S5. $^1\text{H}$ -NMR spectrum of compound 4. ....      | 5  |
| Figure S6. $^{13}\text{C}$ -NMR spectrum of compound 4. ....   | 5  |
| Figure S7. $^1\text{H}$ -NMR spectrum of compound 5. ....      | 6  |
| Figure S8. $^{13}\text{C}$ -NMR spectrum of compound 5. ....   | 6  |
| Figure S9. $^1\text{H}$ -NMR spectrum of compound 6. ....      | 7  |
| Figure S10. $^{13}\text{C}$ -NMR spectrum of compound 6. ....  | 7  |
| Figure S11. $^1\text{H}$ -NMR spectrum of compound 7. ....     | 8  |
| Figure S12. $^{13}\text{C}$ -NMR spectrum of compound 7. ....  | 8  |
| Figure S13. $^1\text{H}$ -NMR spectrum of compound 8. ....     | 9  |
| Figure S14. $^{13}\text{C}$ -NMR spectrum of compound 8. ....  | 9  |
| Figure S15. $^1\text{H}$ -NMR spectrum of compound 9. ....     | 10 |
| Figure S16. $^{13}\text{C}$ -NMR spectrum of compound 9. ....  | 10 |
| Figure S17. $^1\text{H}$ -NMR spectrum of compound 10. ....    | 11 |
| Figure S18. $^{13}\text{C}$ -NMR spectrum of compound 10. .... | 11 |
| Figure S19. $^1\text{H}$ -NMR spectrum of compound 11. ....    | 12 |
| Figure S20. $^{13}\text{C}$ -NMR spectrum of compound 11. .... | 12 |

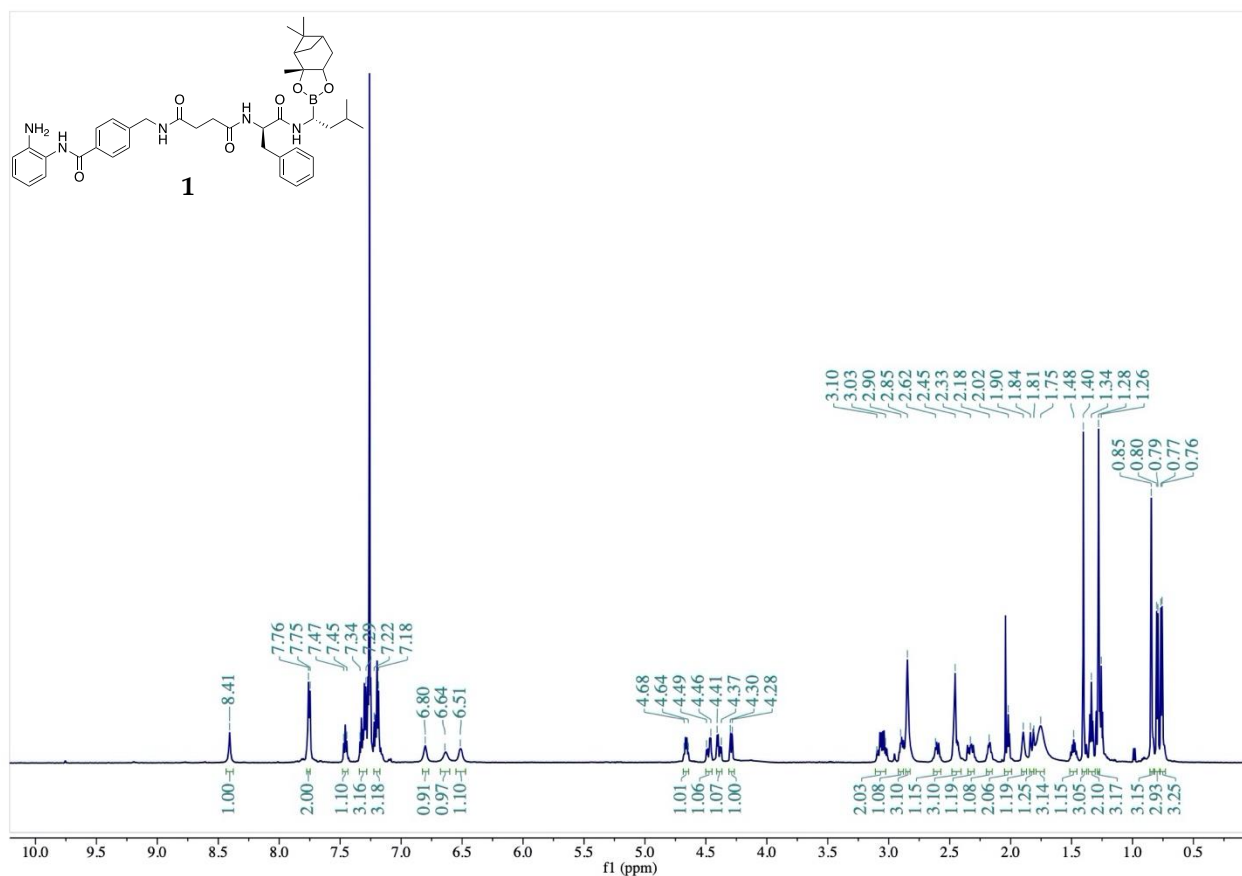

Figure S1. <sup>1</sup>H-NMR spectrum of compound 1.

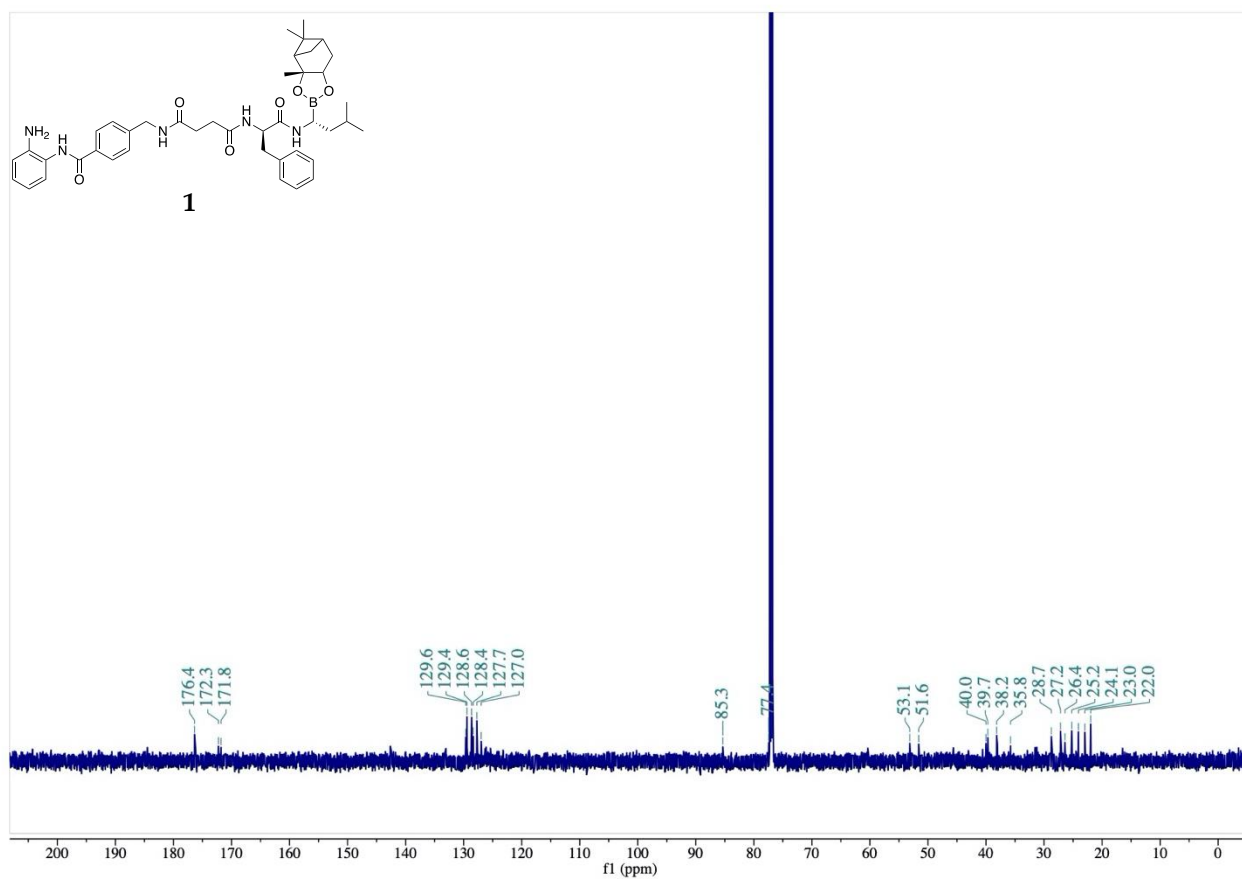

Figure S2. <sup>13</sup>C-NMR spectrum of compound 1.

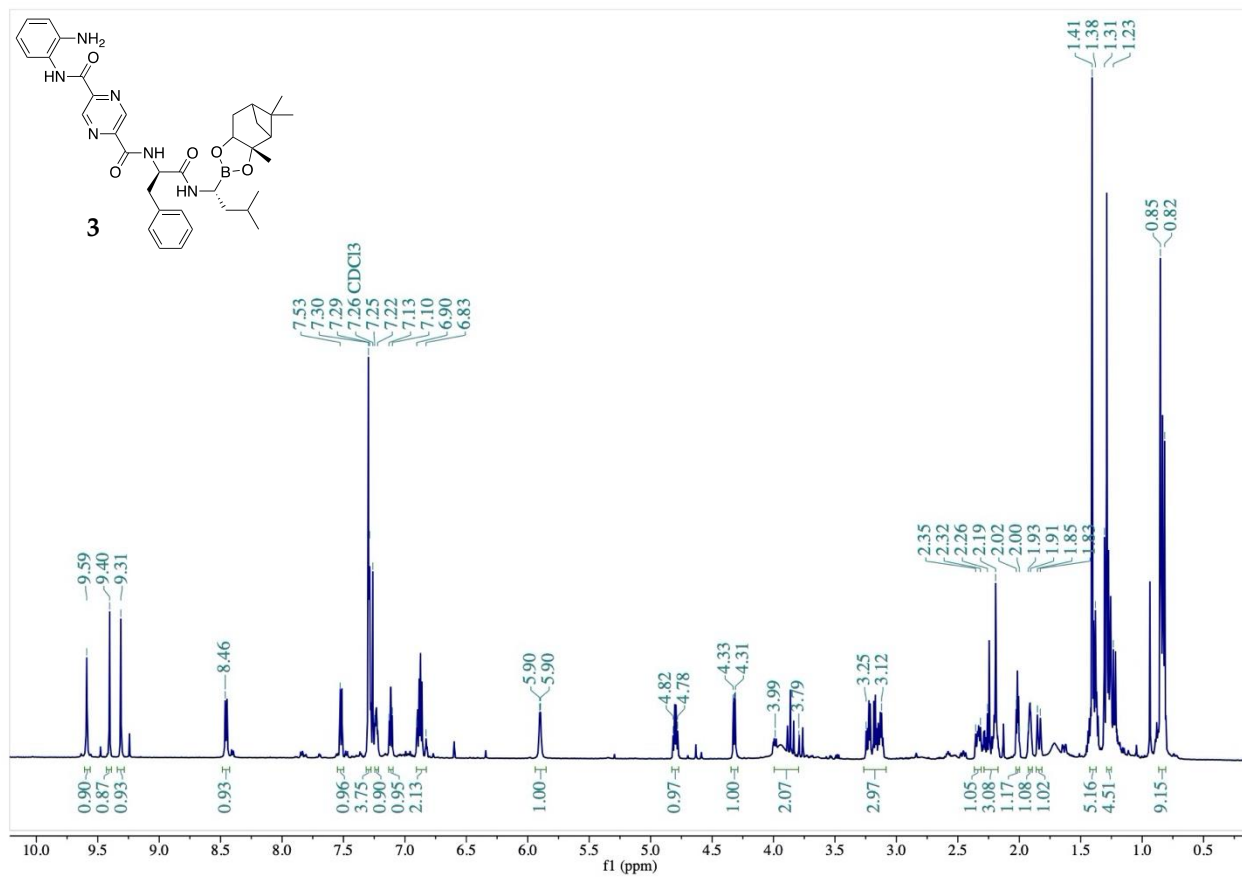

Figure S3. <sup>1</sup>H-NMR spectrum of compound 3.

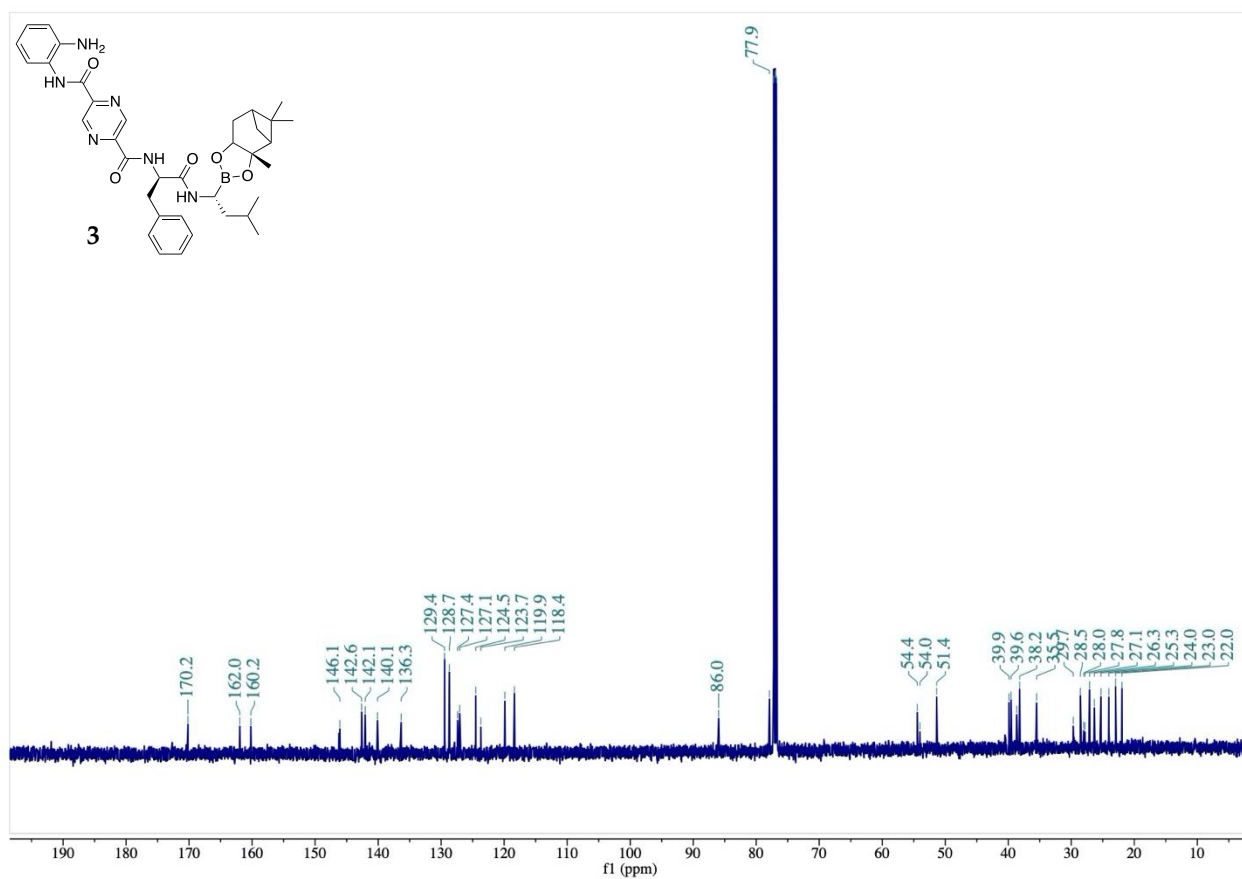

Figure S4. <sup>13</sup>C-NMR spectrum of compound 3.

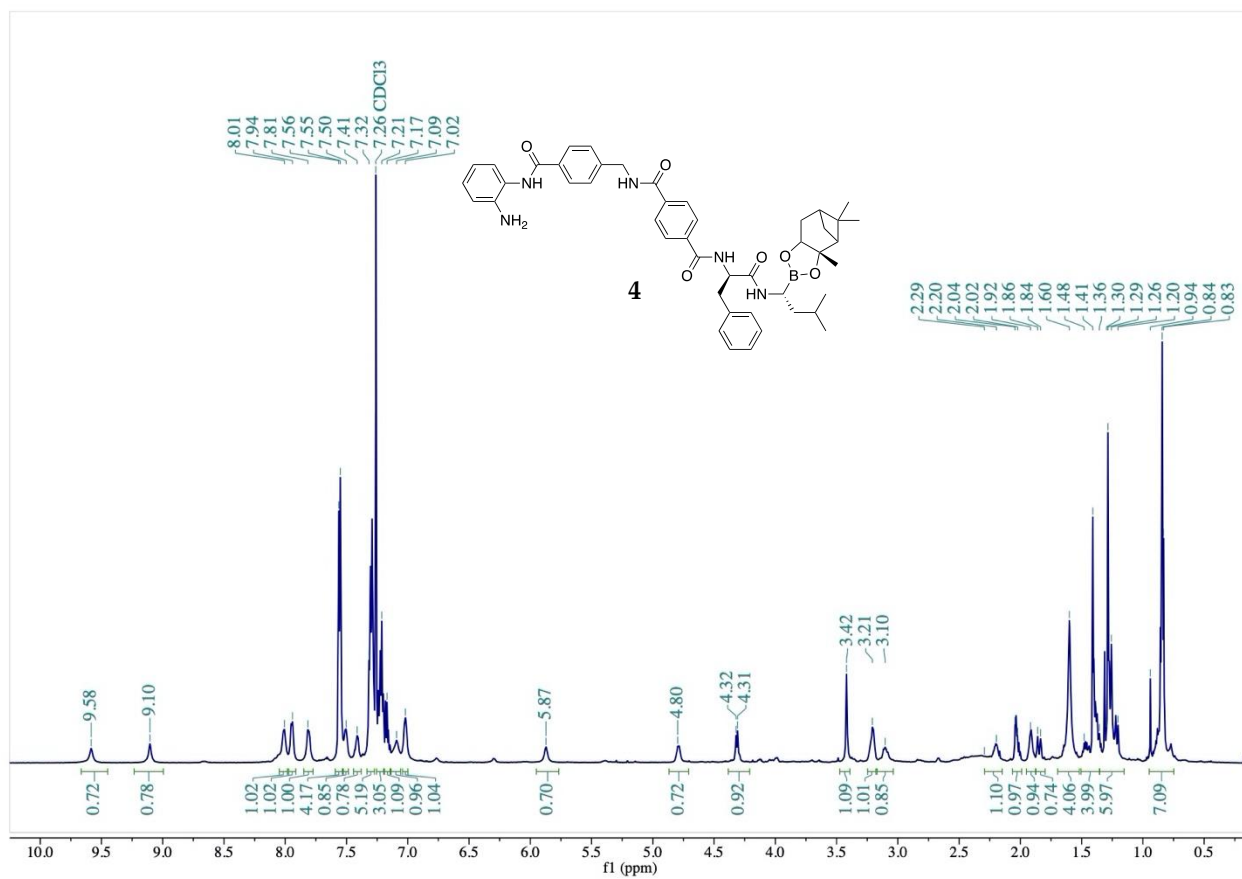

Figure S5. <sup>1</sup>H-NMR spectrum of compound 4.

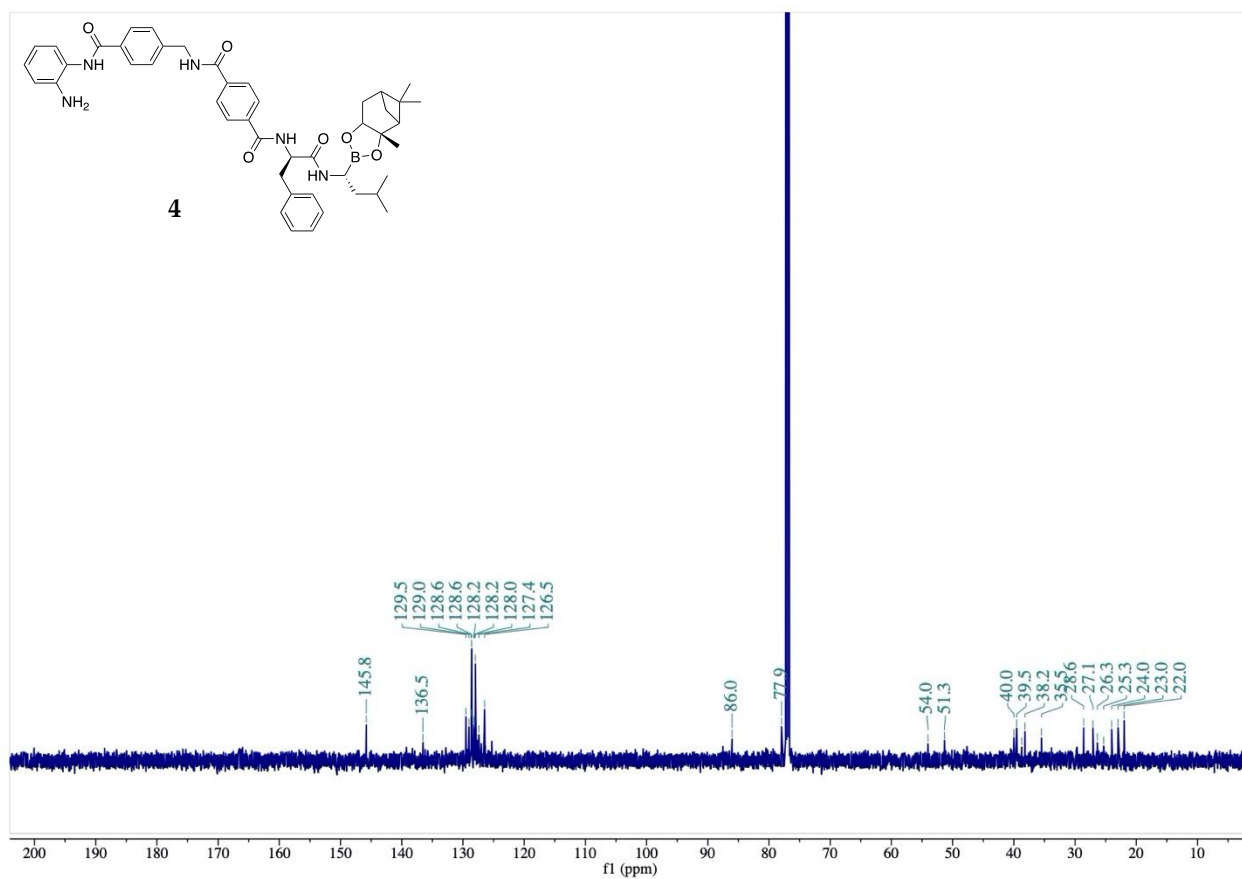

Figure S6. <sup>13</sup>C-NMR spectrum of compound 4.

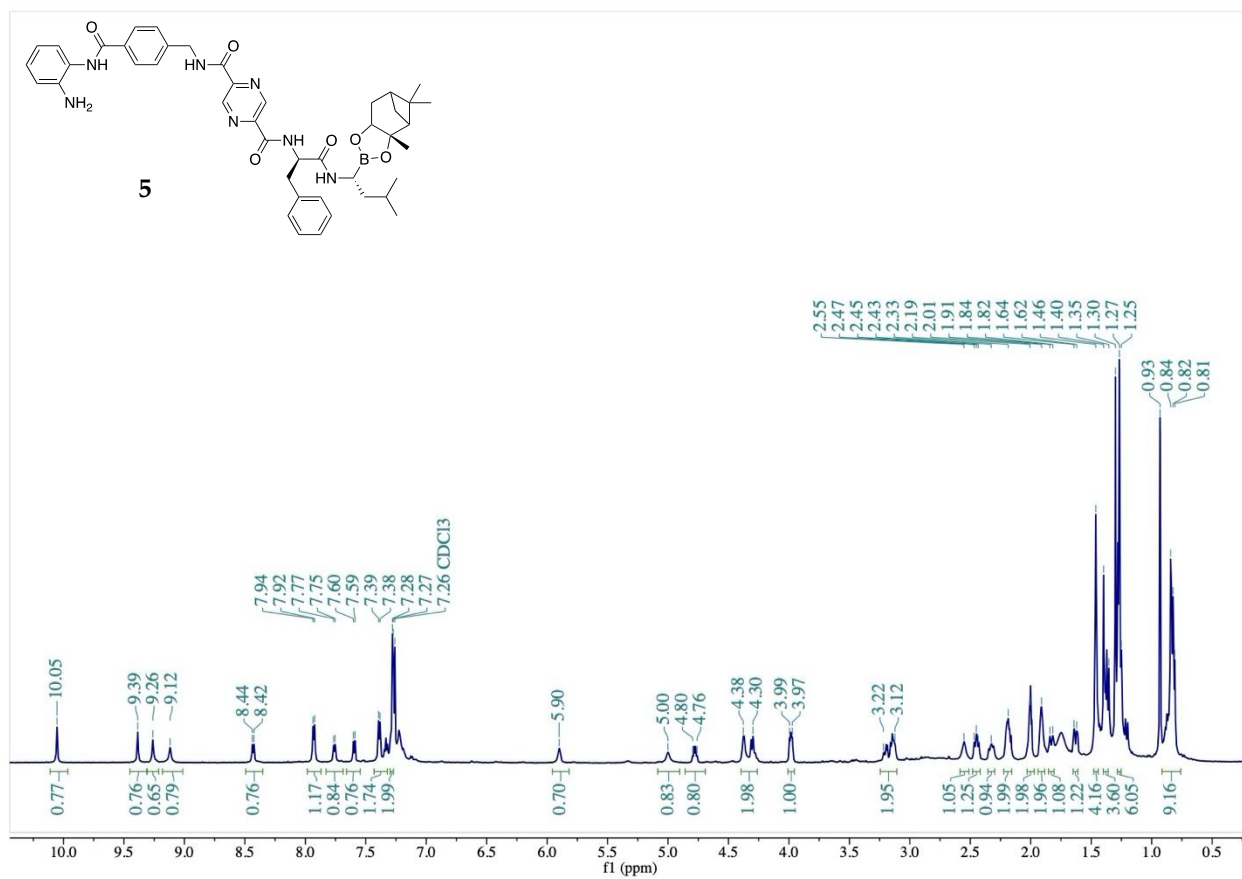

Figure S7. <sup>1</sup>H-NMR spectrum of compound 5.

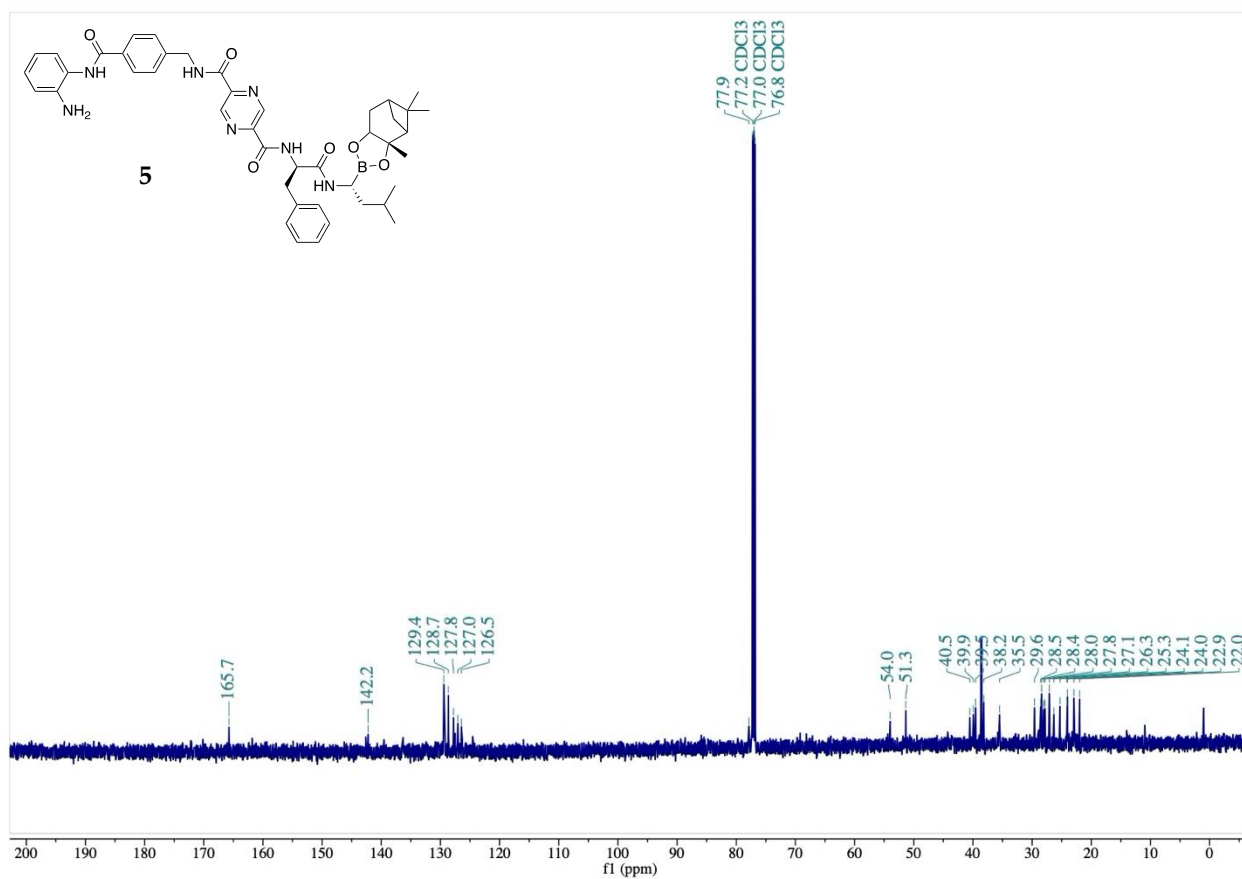

Figure S8. <sup>13</sup>C-NMR spectrum of compound 5.

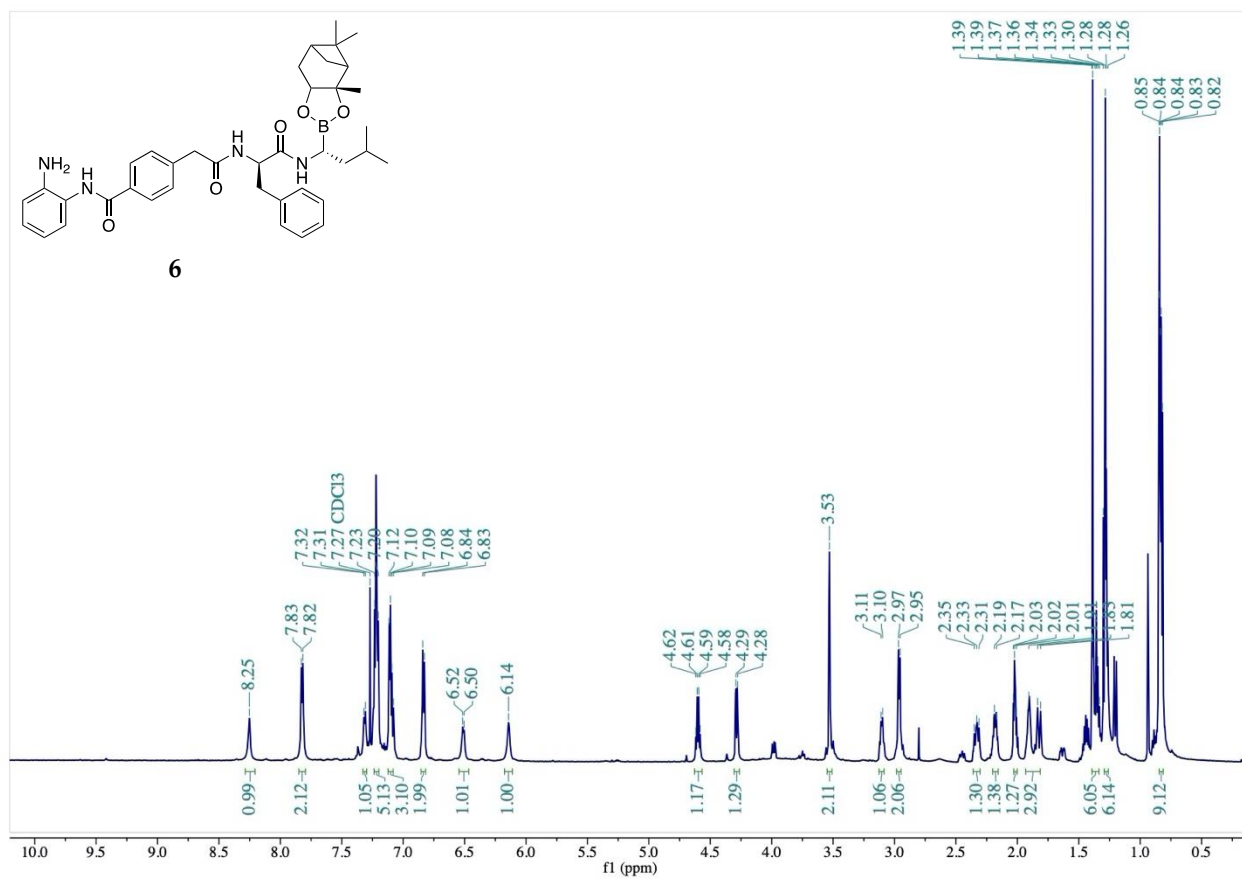

Figure S9. <sup>1</sup>H-NMR spectrum of compound 6.

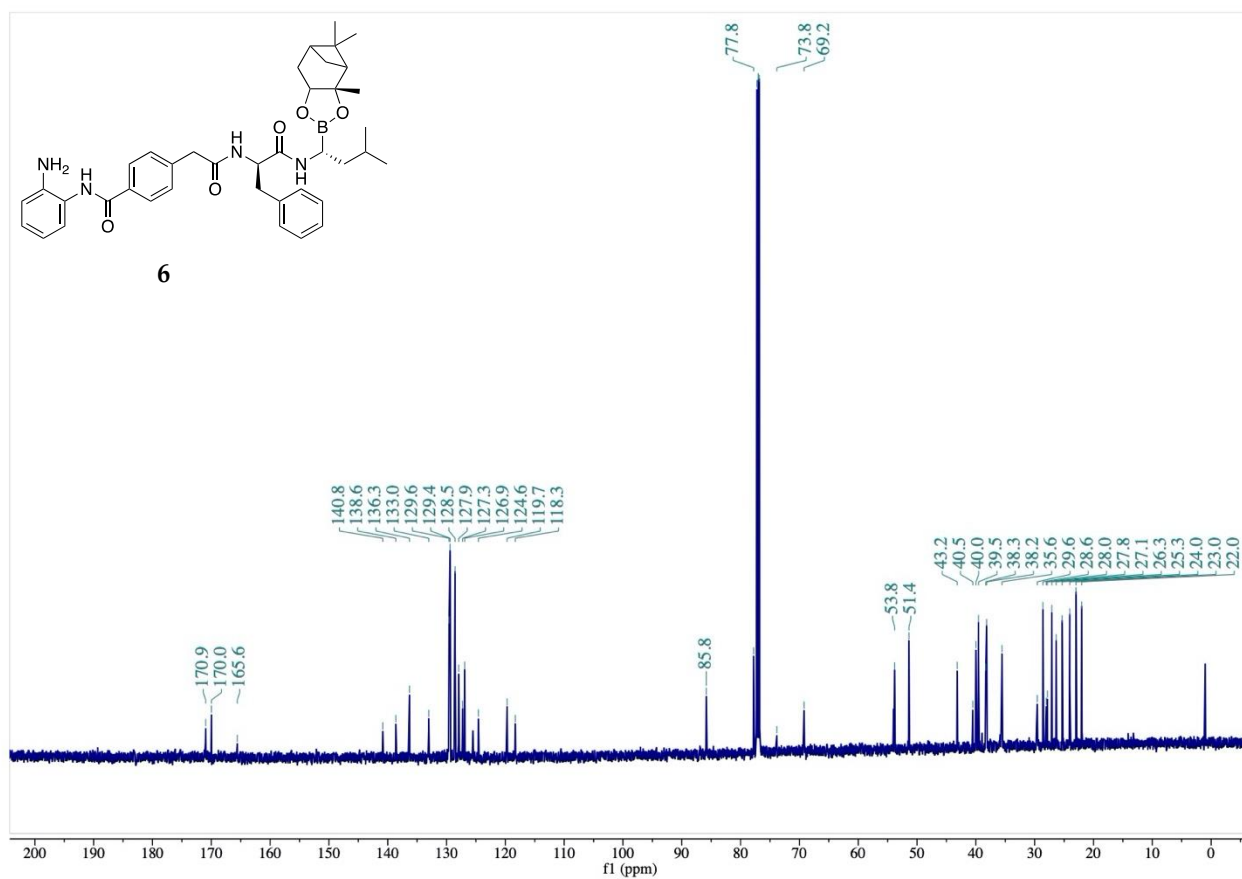

Figure S10. <sup>13</sup>C-NMR spectrum of compound 6.

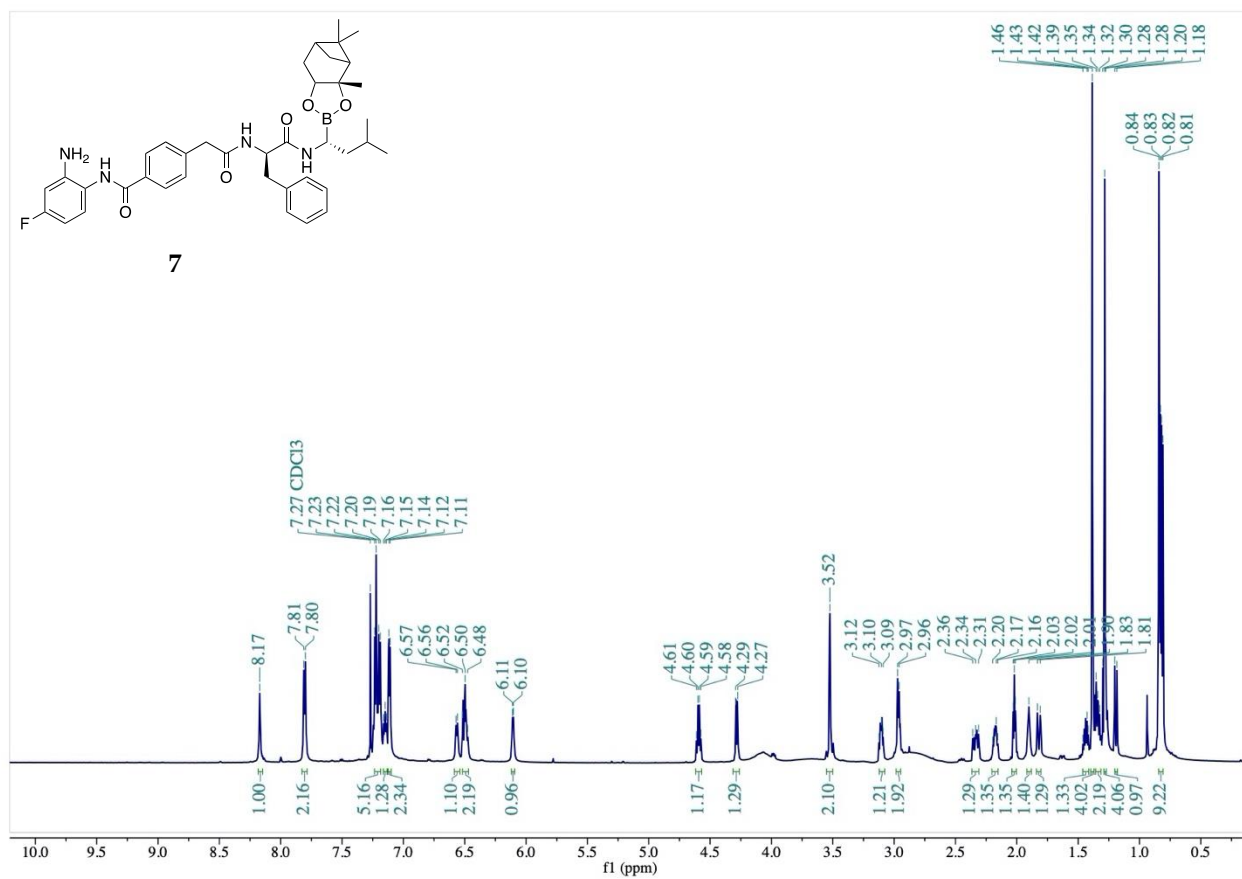

Figure S11. <sup>1</sup>H-NMR spectrum of compound 7.

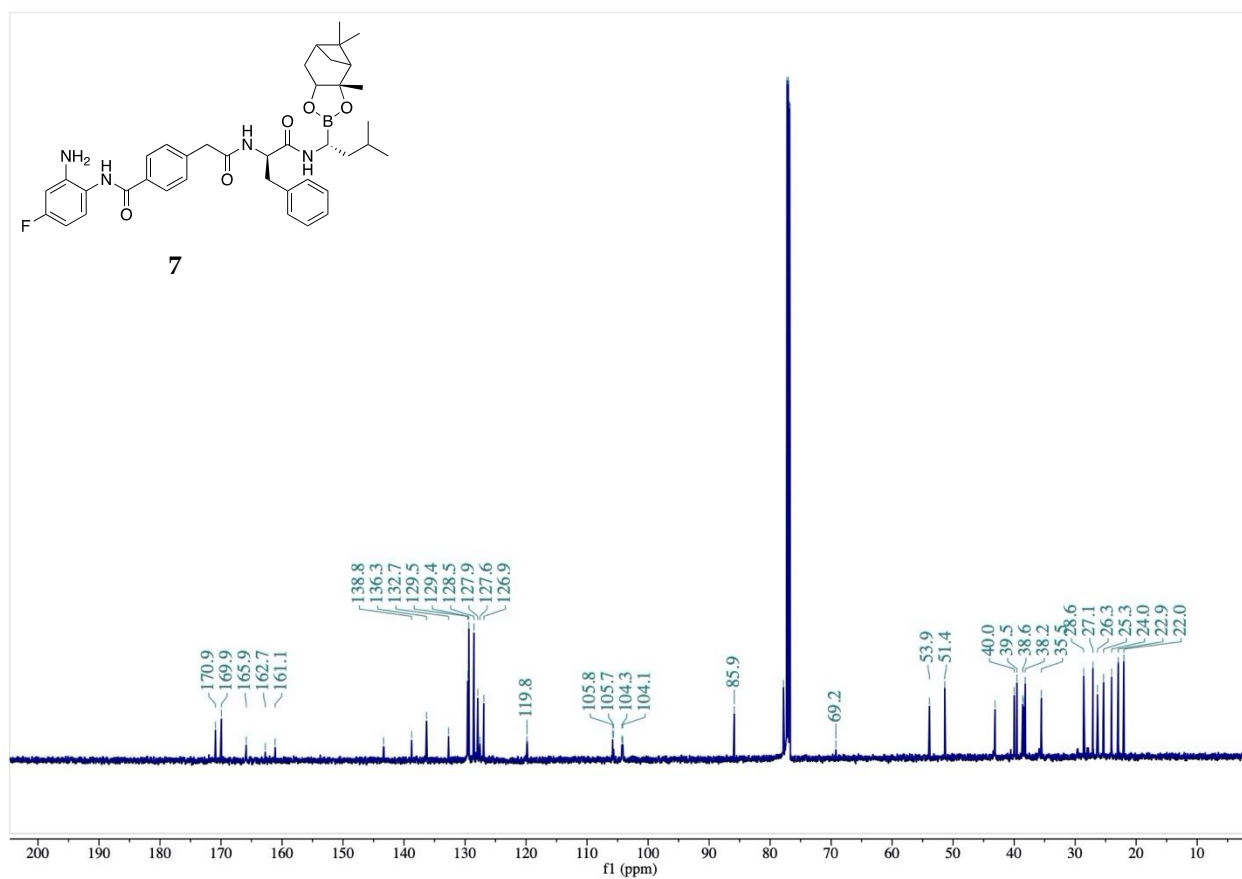

Figure S12. <sup>13</sup>C-NMR spectrum of compound 7.



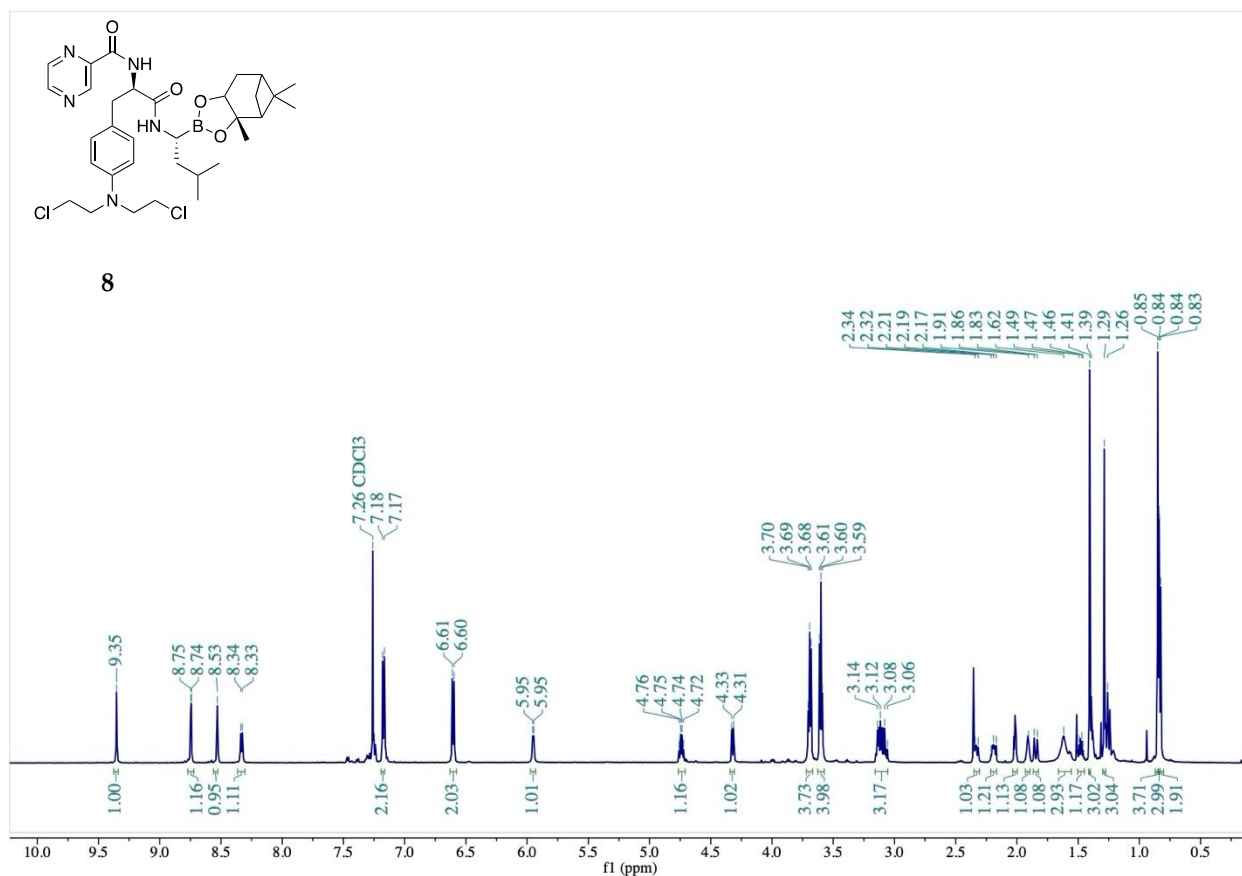

Figure S13. <sup>1</sup>H-NMR spectrum of compound 8.

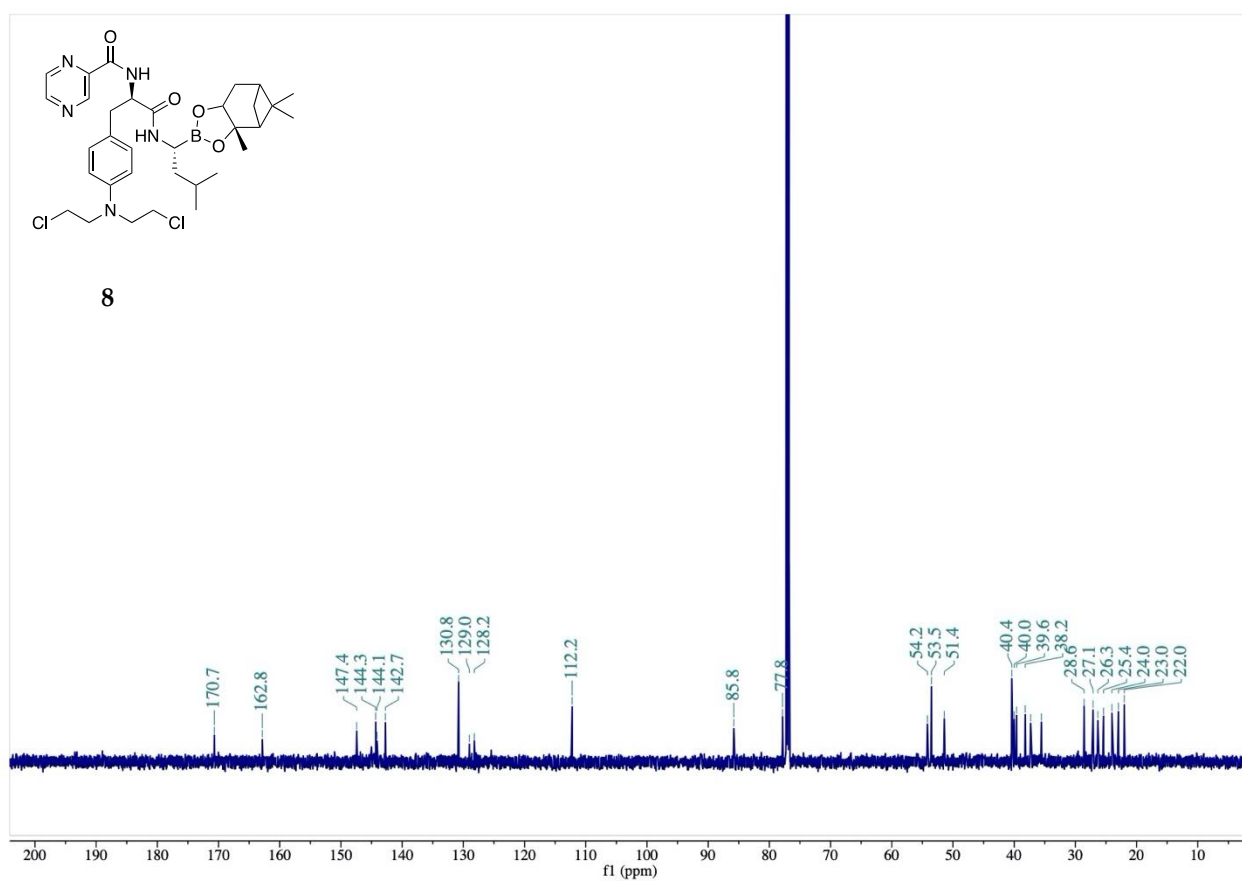

Figure S14. <sup>13</sup>C-NMR spectrum of compound 8.

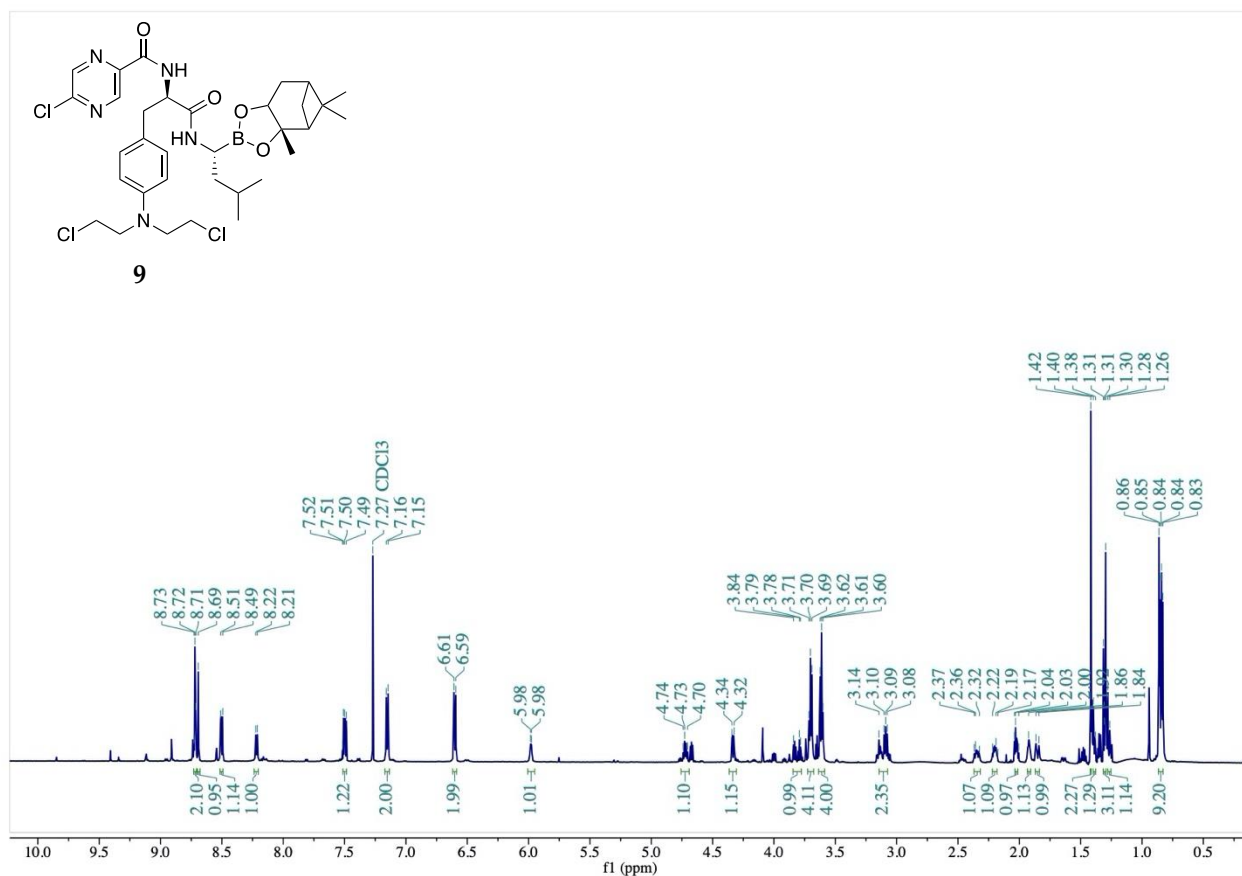

Figure S15.  $^1\text{H}$ -NMR spectrum of compound 9.

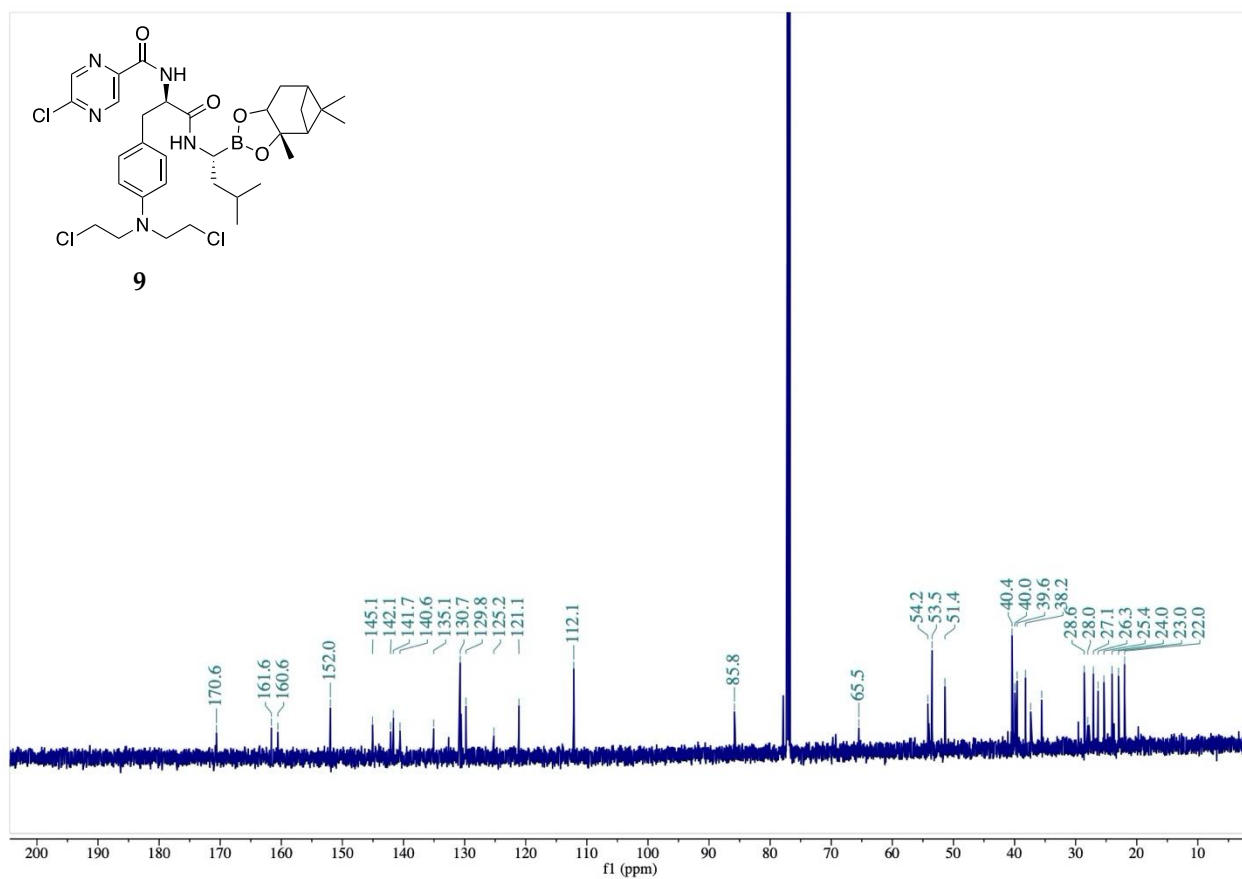

Figure S16.  $^{13}\text{C}$ -NMR spectrum of compound 9.

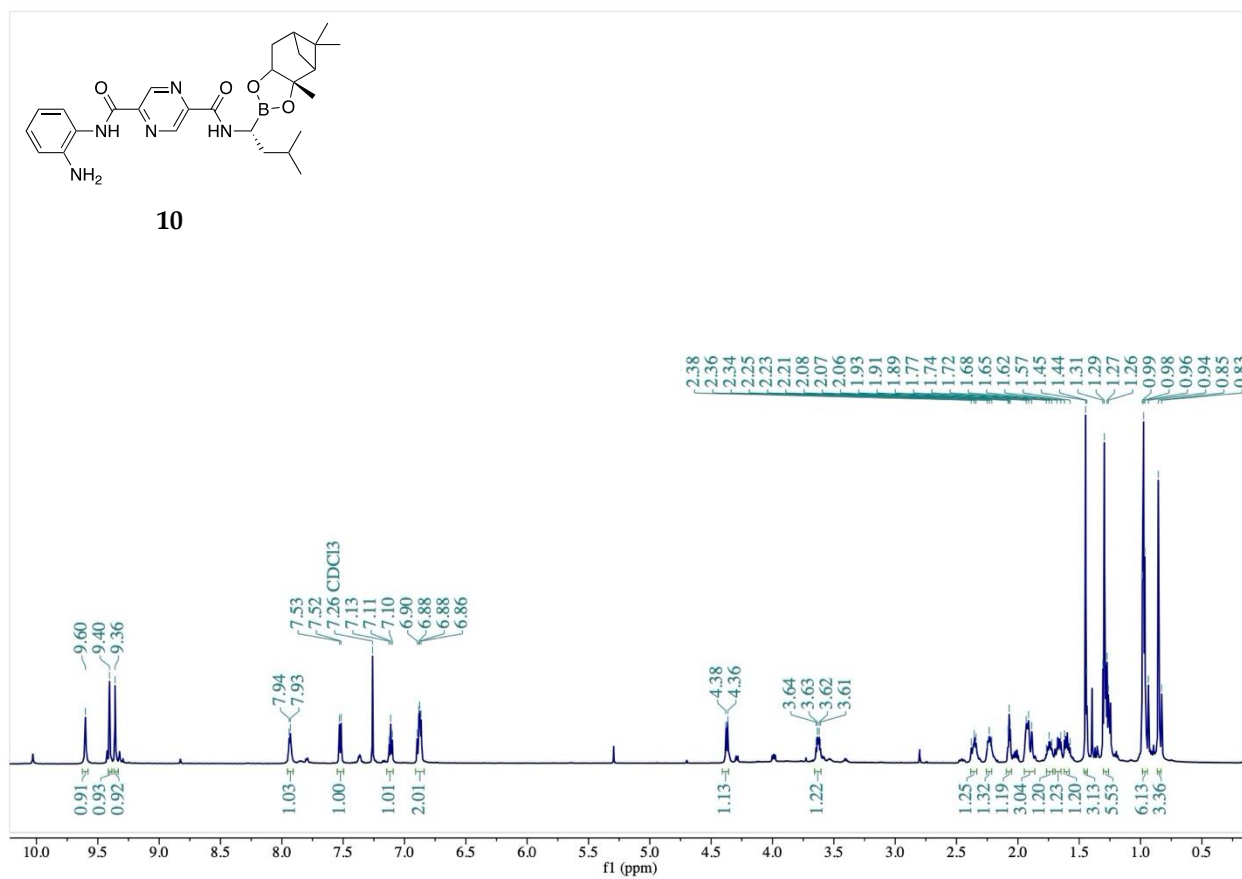

Figure S17. <sup>1</sup>H-NMR spectrum of compound 10.

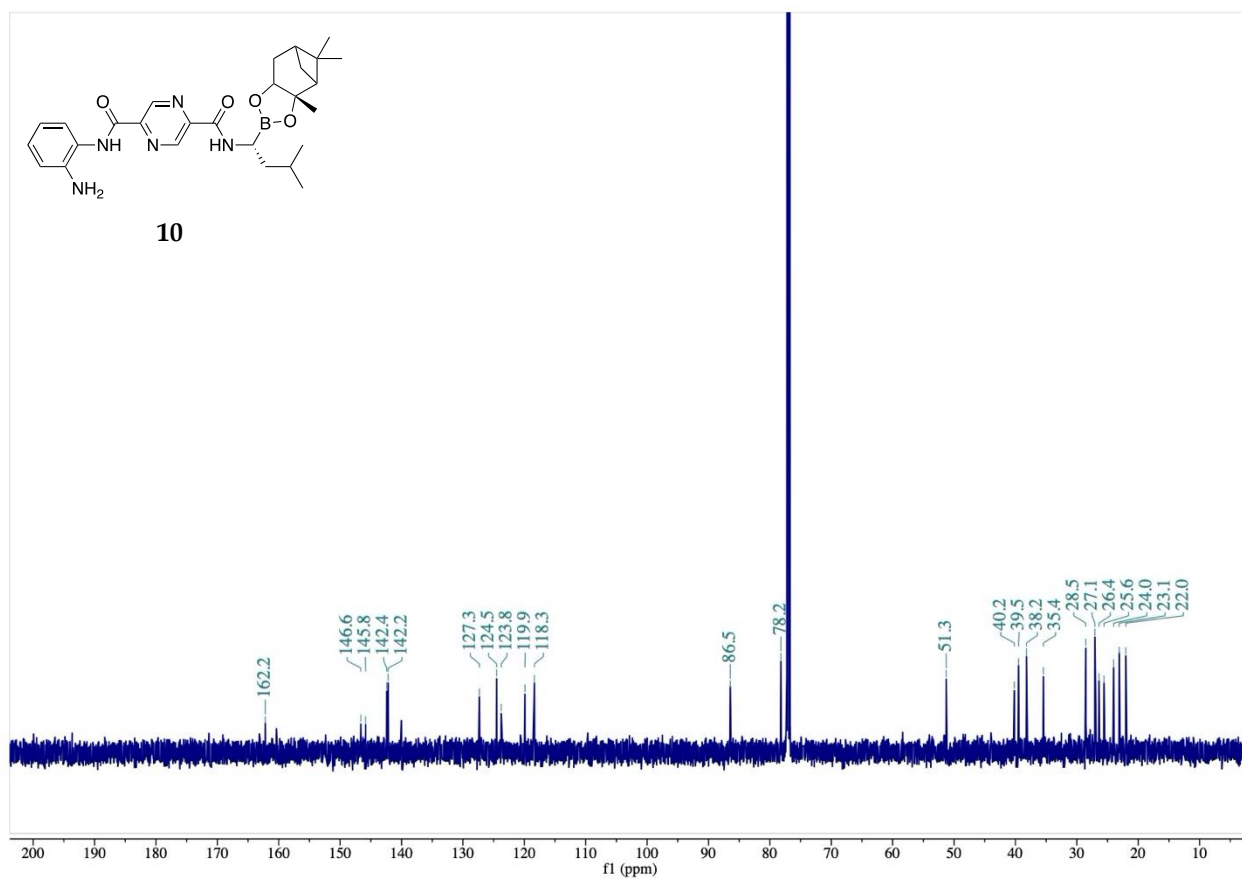

Figure S18. <sup>13</sup>C-NMR spectrum of compound 10.

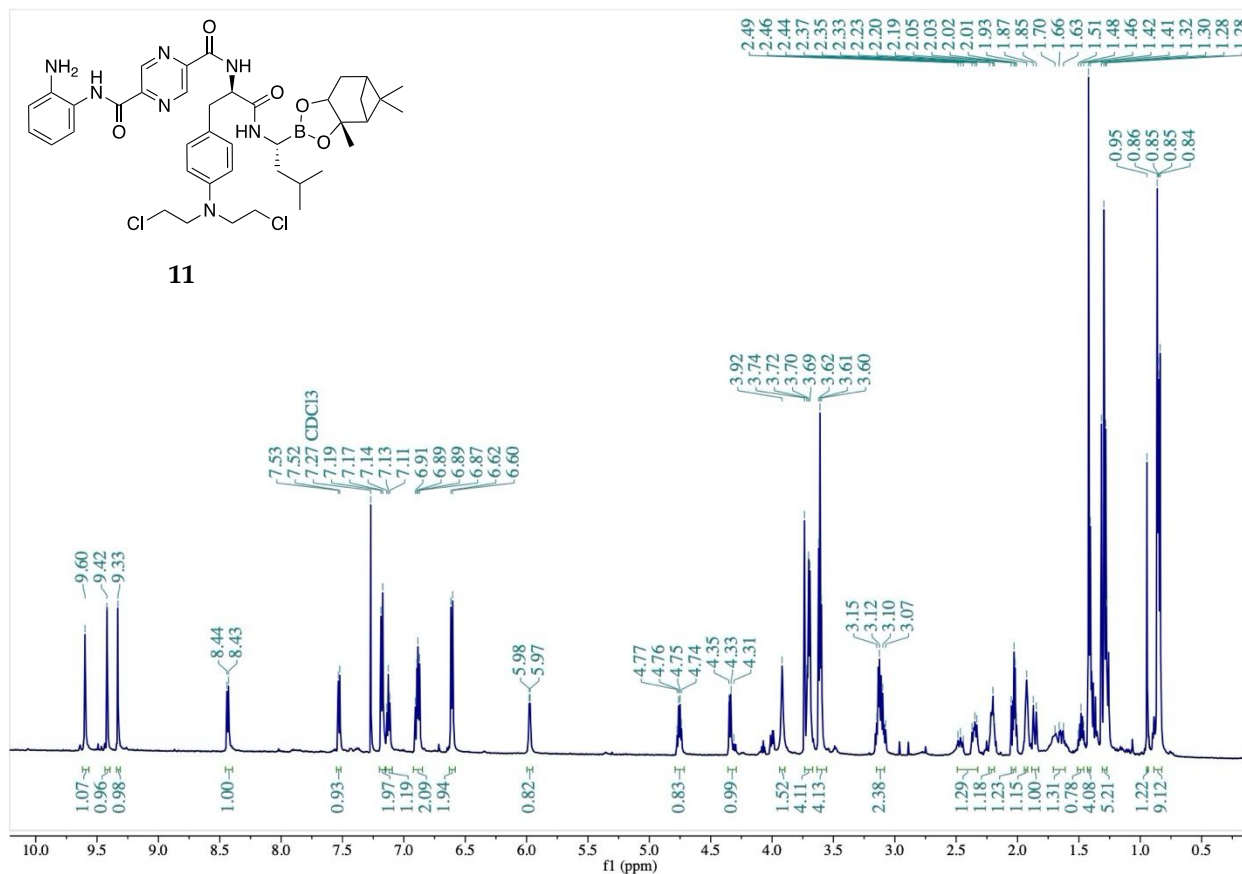

Figure S19. <sup>1</sup>H-NMR spectrum of compound 11.

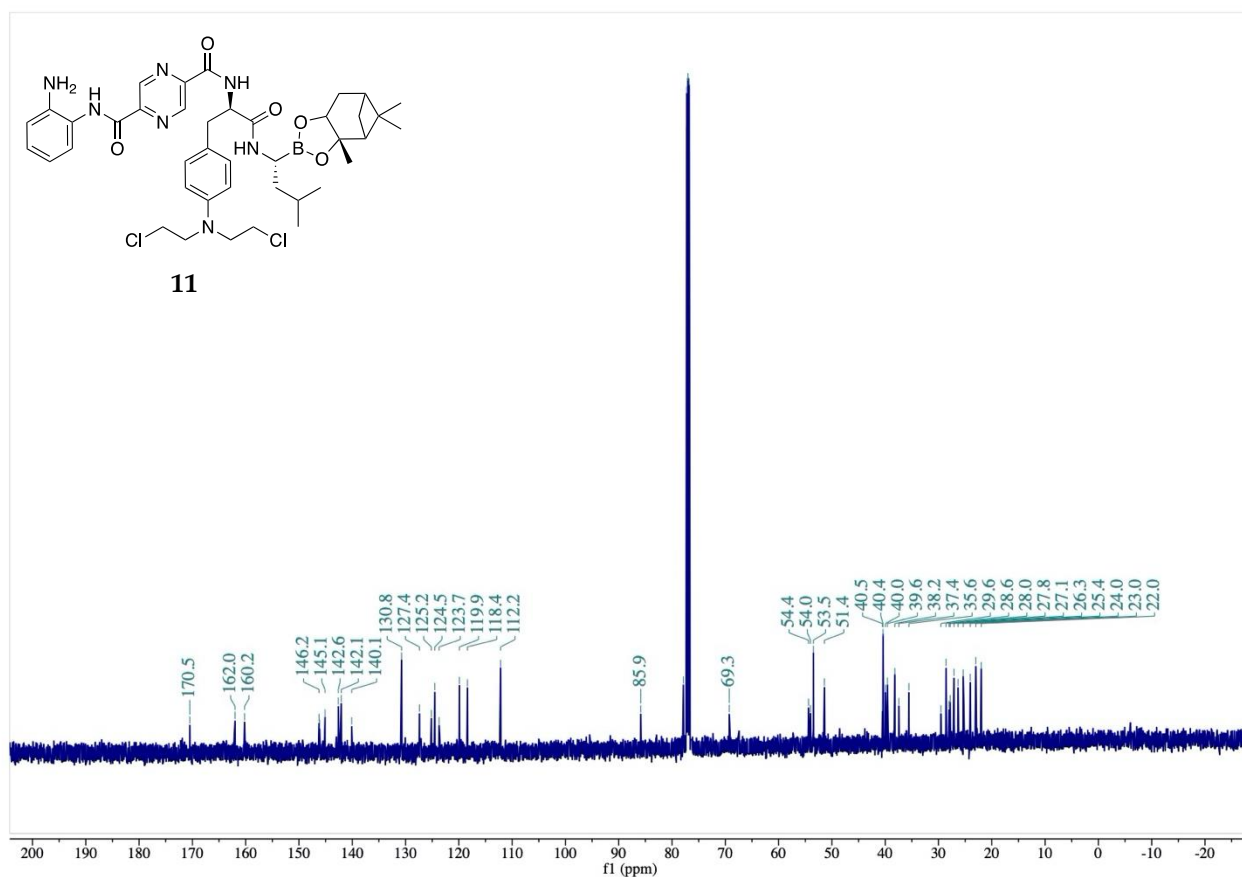

Figure S20. <sup>13</sup>C-NMR spectrum of compound 11.
